# Supplementary material for: Electrochemical Studies of Azulene Modified Electrodes
Source: MDPI journal article supplement (doi:10.3390/sym15020514), 2023-02-15
Supplement: s1 [file s1]

# Electrochemical Studies of Azulene Modified Electrodes

Veronica Anăstăsoaie <sup>1</sup>, Ovidiu Teodor Matică <sup>2</sup>, Cecilia Lete <sup>3</sup>, Raluca Isopescu <sup>2</sup>,  
Vesna Miskovic-Stankovic <sup>4</sup> and Eleonora-Mihaela Ungureanu <sup>2,\*</sup>

<sup>1</sup> National Institute of Research and Development in Microtechnology—IMT Bucharest, 126A, Erou Iancu Nicolae Street, 077190 Voluntari, Romania

<sup>2</sup> Faculty of Chemical Engineering and Biotechnologies, University “Politehnica” of Bucharest, Gheorghe Polizu Str. 1–7, Sector 1, 011061 Bucharest, Romania

<sup>3</sup> Institute of Physical Chemistry “Ilie Murgulescu” of the Romanian Academy, 202 Splaiul Independentei, 060021 Bucharest, Romania

<sup>4</sup> Faculty of Ecology and Environmental Protection, University Union-Nikola Tesla, Cara Dusana 62–64, 11158 Belgrade, Serbia

\* Correspondence: mihaela.ungureanu@upb.ro or em\_ungureanu2000@yahoo.com

Basic properties for **T** and characterization by elemental analysis, UV-Vis, IR, <sup>1</sup>H NMR, <sup>13</sup>C-NMR, MS

Brown crystals, m. p. 258 °C. UV-vis (MeOH),  $\lambda_{\max}$  (log  $\epsilon$ ): 228 (5.06), 290 (4.07), 343 (3.82), 345 (3.82), 347 (3.82), 356 (3.77), 498 (4.41) nm. <sup>1</sup>H-NMR (CDCl<sub>3</sub>, 500 MHz)  $\delta$  7.46–7.51 (m, 4 H, 3-H, 3''-H and 4''-H), 7.54 (t, <sup>3</sup>J = 9.7 Hz, 1 H, 5-H), 7.66 (t, <sup>3</sup>J = 9.9 Hz, 1 H, 7-H), 7.89 (t, <sup>3</sup>J = 9.9 Hz, 1 H, 6-H), 8.04–8.09 (m, 2 H, 2''-H), 8.38 (d, <sup>3</sup>J = 4.8 Hz, 1 H, 2-H), 8.39 (d, <sup>3</sup>J = 9.2 Hz, 1 H, 4-H), 9.22 (d, <sup>3</sup>J = 9.5 Hz, 1 H, 8-H) ppm. <sup>13</sup>C-NMR (CDCl<sub>3</sub>, 125 MHz)  $\delta$  123.1 (C-3), 127.2 (C-2), 128.0 (C-2'' and C-6''), 129.2 (C-3'' and C-5''), 130.0 (C-5), 130.1 (C-7), 131.0 (C-1''), 131.3 (C-4''), 136.2 (C-8), 139.6 (C-4), 140.9 (C-6), 144.7 (C-8a), 146.9 (C-3a), 166.8 (C-5'), 181.7 (C-2') ppm. IR (neat): 680, 750, 778, 859, 1198, 1240, 1268, 1317, 1410, 1455, 1491, 1573, 2360, 2849, 2917, 2955, 3026 cm<sup>-1</sup>. MS [ESI]: 317 [M+1]. Calcd. for: C<sub>18</sub>H<sub>12</sub>N<sub>4</sub>S: C, 68.33; H, 3.82; N, 17.71. Found: C, 68.35; H, 3.84; N, 17.70.

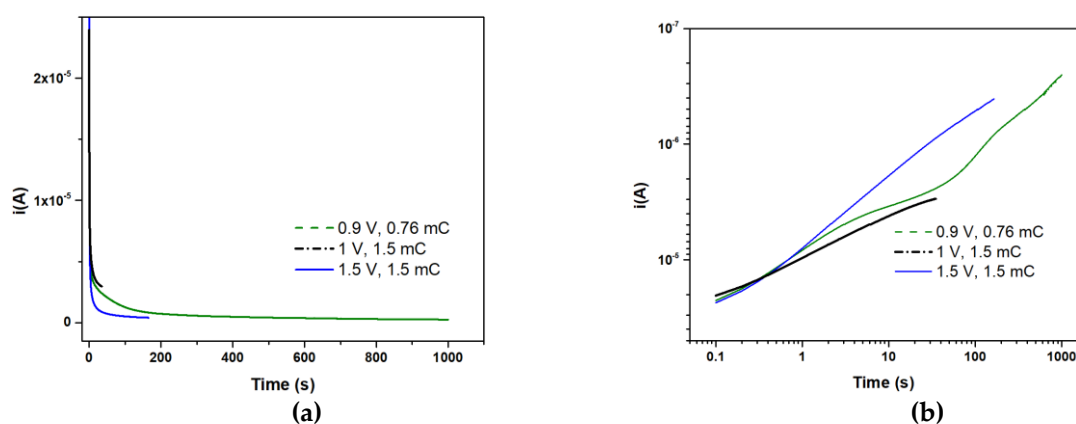

**Figure S1.** Chronoamperograms during the preparation of CMEs by CPE for a constant charge of 1.5 mC at different applied potentials: +1 V (black line), +1.5 V (blue line) and +0.9 V (green line) in real coordinates (a) and logarithmic scale (b).

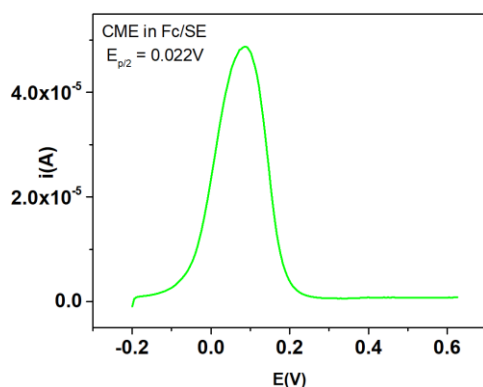

**Figure S2.** DPV curve for **T**-CME prepared by CPE at 1.5 V and 1.5 mC recorded in Fc/SE.

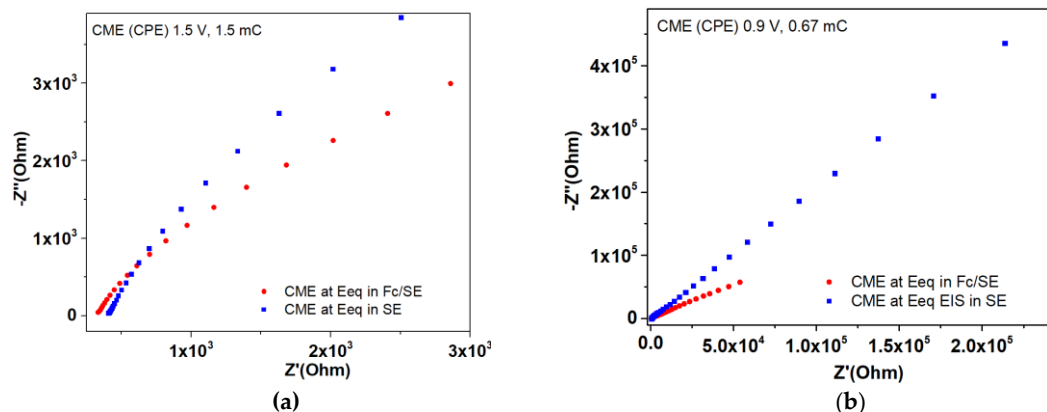

**Figure S3.** EIS curves for CMEs obtained by CPE at equilibrium potentials in SE (blue squares) and in Fc/SE (red dots) for CMEs obtained at: (a) 1.5V, 1.5mC; (b) 0.9V, 0.67mC.

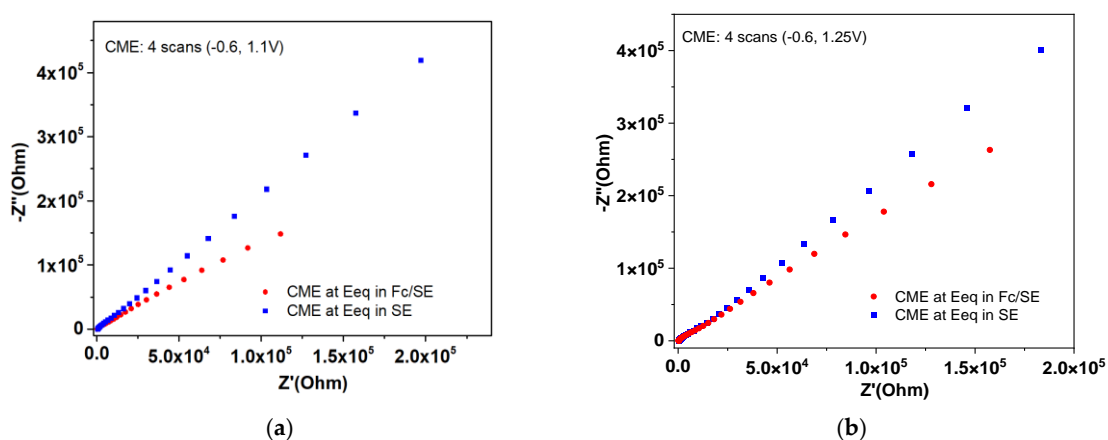

**Figure S4.** EIS curves for CME obtained by scanning (4 scans) in the ranges: (a) -0.6, 1.1V; (b) -0.6, 1.25V at the equilibrium potentials in SE (blue squares) and in Fc/SE (red dots).

**Table S1.** Parameters for EIS curves for CMEs prepared by scanning recorded in type B experiments in SE at different potentials according to models in Figure 6.

| No. | Sample at E (V)                      | Rsol<br>( $\Omega$ ) | CPEdl   |         | Rct<br>( $\Omega$ ) | W                    |                        |       | Circuit<br>model | X <sup>2</sup>         |
|-----|--------------------------------------|----------------------|---------|---------|---------------------|----------------------|------------------------|-------|------------------|------------------------|
|     |                                      |                      | CPEdl-T | CPEdl-P |                     | Rw ( $\Omega$ )      | Wo-T ( $\mu\text{F}$ ) | Wo-P  |                  |                        |
| 1   | CME (1.1 V, 4 scs in Fc SE) at Eeq   | 240                  | 2.55    | 0.874   | 9887                | $8.448 \times 10^5$  | 32.73                  | 0.57  | C2               | $6.496 \times 10^{-4}$ |
| 2   | CME (1.25 V, 4 scs in Fc SE) at Eeq  | 290                  | 2.29    | 0.878   | 21665               | 630                  | 0.00013                | 0.318 | C1               | $4.734 \times 10^{-4}$ |
| 3   | CME (0.9 V, 0.67 mC in Fc SE) at Eeq | 367.5                | 3.17    | 0.842   | 6108                | $1.7830 \times 10^5$ | 10                     | 0.52  | C1               | $1.705 \times 10^{-3}$ |
| 4   | CME (1.1 V, 4 scs in SE) at Eeq      | 340                  | 2.3     | 0.869   | 37053               | 139.7                | $7.902 \times 10^{-6}$ | 0.132 | C1               | $3.247 \times 10^{-4}$ |
| 5   | CME (1.25 V, 4 scs in SE) at Eeq     | 356.4                | 2.4     | 0.843   | 36964               | 2128                 | $7.535 \times 10^{-4}$ | 0.346 | C1               | $5.424 \times 10^{-4}$ |
| 6   | CME (0.9 V, 0.67 mC in SE) at Eeq    | 351.4                | 3.03    | 0.804   | 83093               | $8.4197 \times 10^6$ | 72.92                  | 0.66  | C2               | $4.838 \times 10^{-4}$ |
